# Supplementary material for: Water-table-driven greenhouse gas emission estimates guide peatland restoration at national scale
Source: Copernicus journal article supplement (doi:10.5194/bg-20-2387-2023), 2023-06-22
Supplement: Supplementary file 1 [file bg-20-2387-2023-supplement.pdf]

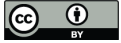

*Supplement of*

## **Water-table-driven greenhouse gas emission estimates guide peatland restoration at national scale**

**Julian Koch et al.**

*Correspondence to:* Julian Koch ([juko@geus.dk](mailto:juko@geus.dk))

The copyright of individual parts of the supplement might differ from the article licence.

## **Contents of this file**

Tables S1 and S2

## **Introduction**

The tables S1 and S2 present the Danish data synthesis for CO<sub>2</sub> and CH<sub>4</sub> fluxes that we utilized to derive response functions for greenhouse gas emissions in relation to water table depth at mean annual conditions.

**Table S1: Overview of measurement sites included in the Danish data synthesis for CO<sub>2</sub> fluxes. MAT: mean annual temperature, MAP: mean annual precipitation, GWT: groundwater table, where negative values indicate a water table below terrain.**

| Site           | Coordinates      | Soil Type                                           | Main crop           | Starting Monitoring | Ending Monitoring | MAT (Celsius) | MAP (mm) | Mean GWT-cm | Soil Depth-cm | Organic C-% | C:N ratio | pH  | Mean Annual CO <sub>2</sub> emission-NECB (Mg C ha <sup>-1</sup> yr <sup>-1</sup> ) | Reference                                                                                                                                                                                                                |
|----------------|------------------|-----------------------------------------------------|---------------------|---------------------|-------------------|---------------|----------|-------------|---------------|-------------|-----------|-----|-------------------------------------------------------------------------------------|--------------------------------------------------------------------------------------------------------------------------------------------------------------------------------------------------------------------------|
| Skjern-W       | 55°56'N, 8°26'E  | Organic soil with different agricultural management | Arable crop- Barley | 2008/08             | 2009/09           | 9.3           | 913      | -48         | 0-30          | 20.3        | 17        | 5   | 15.3                                                                                | Elsgaard, L., et al., Net ecosystem exchange of CO <sub>2</sub> and carbon balance for eight temperate organic soils under agricultural management. <i>Agriculture, Ecosystems &amp; Environment</i> , 2012. 162: 52-67. |
| Skjern-W       | 55°56'N, 8°26'E  | Organic soil with different agricultural management | Permanent grassland | 2008/08             | 2009/09           | 9.6           | 913      | -42         | 0-30          | 15.7        | 18.2      | 4.9 | 6.9                                                                                 | Elsgaard, L., et al., Net ecosystem exchange of CO <sub>2</sub> and carbon balance for eight temperate organic soils under agricultural management. <i>Agriculture, Ecosystems &amp; Environment</i> , 2012. 162: 52-67. |
| St. Vildmose-N | 57°13'N, 09°49'E | Organic soil with different agricultural management | Arable crop- Potato | 2008/08             | 2009/09           | 8.7           | 702      | -70         | 0-30          | 47.3        | 30.2      | 4.5 | 7                                                                                   | Elsgaard, L., et al., Net ecosystem exchange of CO <sub>2</sub> and carbon balance for eight temperate organic soils under agricultural management. <i>Agriculture, Ecosystems &amp; Environment</i> , 2012. 162: 52-67. |
| St. Vildmose-N | 57°13'N, 09°49'E | Organic soil with different agricultural management | Permanent grassland | 2008/08             | 2009/09           | 8.6           | 702      | -61         | 0-30          | 42.7        | 27.7      | 5.1 | 10.4                                                                                | Elsgaard, L., et al., Net ecosystem exchange of CO <sub>2</sub> and carbon balance for eight temperate organic soils under agricultural management. <i>Agriculture, Ecosystems &amp; Environment</i> , 2012. 162: 52-67. |
| St. Vildmose-N | 57°13'N, 09°49'E | Organic soil with different agricultural management | Rotational grass    | 2008/08             | 2009/09           | 9.1           | 702      | -70         | 0-30          | 45.3        | 27.9      | 4.9 | 11.5                                                                                | Elsgaard, L., et al., Net ecosystem exchange of CO <sub>2</sub> and carbon balance for eight temperate organic soils under agricultural management. <i>Agriculture, Ecosystems &amp; Environment</i> , 2012. 162: 52-67. |

|         |                     |                                                                 |                              |         |         |      |     |      |      |      |      |     |      |                                                                                                                                                                                                              |
|---------|---------------------|-----------------------------------------------------------------|------------------------------|---------|---------|------|-----|------|------|------|------|-----|------|--------------------------------------------------------------------------------------------------------------------------------------------------------------------------------------------------------------|
| Mørke-E | 56°23'N,<br>10°24'E | Organic soil<br>with<br>different<br>agricultural<br>management | Arable crop-<br>Barley/Grass | 2008/08 | 2009/09 | 9.2  | 579 | -111 | 0-30 | 32.7 | 29.3 | 4.9 | 7.2  | Elsgaard, L., et al., Net ecosystem exchange of CO <sub>2</sub> and carbon balance for eight temperate organic soils under agricultural management. Agriculture, Ecosystems & Environment, 2012. 162: 52-67. |
| Mørke-E | 56°23'N,<br>10°24'E | Organic soil<br>with<br>different<br>agricultural<br>management | Permanent<br>grassland       | 2008/08 | 2009/09 | 9    | 579 | -40  | 0-30 | 29.7 | 25.1 | 4.7 | 7.9  | Elsgaard, L., et al., Net ecosystem exchange of CO <sub>2</sub> and carbon balance for eight temperate organic soils under agricultural management. Agriculture, Ecosystems & Environment, 2012. 162: 52-67. |
| Mørke-E | 56°23'N,<br>10°24'E | Organic soil<br>with<br>different<br>agricultural<br>management | Rotational<br>grass          | 2008/08 | 2009/09 | 9.2  | 579 | -43  | 0-30 | 30   | 25.6 | 5.8 | 16.7 | Elsgaard, L., et al., Net ecosystem exchange of CO <sub>2</sub> and carbon balance for eight temperate organic soils under agricultural management. Agriculture, Ecosystems & Environment, 2012. 162: 52-67. |
| Nørre Å | 56°44'N,<br>9°68'E  | Fen<br>peatland                                                 | Reed canary<br>grass         | 2012/05 | 2012/05 | 14.2 | 294 | 0    | 0-20 | 37.8 | 11.6 |     | -3.6 | Karki, S., et al., Carbon balance of rewetted and drained peat soils used for biomass production: a mesocosm study. GCB Bioenergy, 2016. 8(5): 969-980.                                                      |
| Nørre Å | 56°44'N,<br>9°68'E  | Fen<br>peatland                                                 | Reed canary<br>grass         | 2012/05 | 2012/05 | 14.2 | 294 | -10  | 0-20 | 37.8 | 11.6 |     | 0.1  | Karki, S., et al., Carbon balance of rewetted and drained peat soils used for biomass production: a mesocosm study. GCB Bioenergy, 2016. 8(5): 969-980.                                                      |
| Nørre Å | 56°44'N,<br>9°68'E  | Fen<br>peatland                                                 | Reed canary<br>grass         | 2012/05 | 2012/05 | 14.2 | 294 | -20  | 0-20 | 37.8 | 11.6 |     | 4.3  | Karki, S., et al., Carbon balance of rewetted and drained peat soils used for biomass production: a mesocosm study. GCB Bioenergy, 2016. 8(5): 969-980.                                                      |

|                    |                     |                                 |                                                      |         |         |      |     |     |      |      |      |         |      |                                                                                                                                                                                                              |
|--------------------|---------------------|---------------------------------|------------------------------------------------------|---------|---------|------|-----|-----|------|------|------|---------|------|--------------------------------------------------------------------------------------------------------------------------------------------------------------------------------------------------------------|
| Nørre Å            | 56°44'N,<br>9°68'E  | Fen<br>peatland                 | Reed canary<br>grass                                 | 2012/05 | 2012/05 | 14.2 | 294 | -30 | 0-20 | 37.8 | 11.6 |         | 3.5  | Karki, S., et al., Carbon balance of rewetted and drained peat soils used for biomass production: a mesocosm study. GCB Bioenergy, 2016. 8(5): 969-980.                                                      |
| Nørre Å            | 56°44'N,<br>9°68'E  | Fen<br>peatland                 | Reed canary<br>grass                                 | 2012/05 | 2012/05 | 14.2 | 294 | -40 | 0-20 | 37.8 | 11.6 |         | 10   | Karki, S., et al., Carbon balance of rewetted and drained peat soils used for biomass production: a mesocosm study. GCB Bioenergy, 2016. 8(5): 969-980.                                                      |
| Odense River Basin | 55°13'N,<br>10°17'E | Rewetted<br>riparian<br>wetland | creeping<br>bentgrass                                | 2015/03 | 2016/03 | 8.8  | 808 | 0   | 0-25 | 30   |      | 5.9-6.9 | 2.2  | Kandel, T.P., et al., Complete annual CO <sub>2</sub> , CH <sub>4</sub> , and N <sub>2</sub> O balance of a temperate riparian wetland 12 years after rewetting. Ecological Engineering, 2019. 127: 527-535. |
| Nørre Å            | 56°27'N,<br>9°40'E  | Fen<br>peatland                 | Reed canary<br>grass-<br>Fertilized<br>paludiculture | 2015/03 | 2017/02 | 7.9  | 650 | -1  | 0-20 | 36.3 | 12.1 | 6.1-7.1 | 0.6  | Karki, S., et al., Annual CO <sub>2</sub> fluxes from a cultivated fen with perennial grasses during two initial years of rewetting. Mires & Peat, 2019. 25.                                                 |
| Nørre Å            | 56°27'N,<br>9°40'E  | Fen<br>peatland                 | Reed canary<br>grass-<br>Fertilized<br>paludiculture | 2015/03 | 2017/02 | 7.9  | 650 | -9  | 0-20 | 36.3 | 12.1 | 6.1-7.1 | 2.4  | Karki, S., et al., Annual CO <sub>2</sub> fluxes from a cultivated fen with perennial grasses during two initial years of rewetting. Mires & Peat, 2019. 25.                                                 |
| Nørre Å            | 56°44'N,<br>9°68'E  | Fen peat                        | Reed canary<br>grass                                 | 2013/05 | 2013/09 | 14.2 | 294 | 0   | 0-20 | 37.8 | 11.8 |         | -3.6 | Karki, S., et al., Carbon balance of rewetted and drained peat soils used for biomass production: a mesocosm study. Gcb Bioenergy, 2016. 8(5): 969-980.                                                      |

|                    |                    |          |                        |         |         |      |     |     |      |      |      |     |       |                                                                                                                                                                                                                         |
|--------------------|--------------------|----------|------------------------|---------|---------|------|-----|-----|------|------|------|-----|-------|-------------------------------------------------------------------------------------------------------------------------------------------------------------------------------------------------------------------------|
| Nørre Å            | 56°44'N,<br>9°68'E | Fen peat | Reed canary<br>grass   | 2013/05 | 2013/09 | 14.2 | 294 | -10 | 0-20 | 37.8 | 11.8 |     | 0.1   | Karki, S., et al., Carbon balance of rewetted and drained peat soils used for biomass production: a mesocosm study. <i>Gcb Bioenergy</i> , 2016. 8(5): 969-980.                                                         |
| Nørre Å            | 56°44'N,<br>9°68'E | Fen peat | Reed canary<br>grass   | 2013/05 | 2013/09 | 14.2 | 294 | -20 | 0-20 | 37.8 | 11.8 |     | 4.3   | Karki, S., et al., Carbon balance of rewetted and drained peat soils used for biomass production: a mesocosm study. <i>Gcb Bioenergy</i> , 2016. 8(5): 969-980.                                                         |
| Nørre Å            | 56°44'N,<br>9°68'E | Fen peat | Reed canary<br>grass   | 2013/05 | 2013/09 | 14.2 | 294 | -30 | 0-20 | 37.8 | 11.8 |     | 3.5   | Karki, S., et al., Carbon balance of rewetted and drained peat soils used for biomass production: a mesocosm study. <i>Gcb Bioenergy</i> , 2016. 8(5): 969-980.                                                         |
| Nørre Å            | 56°44'N,<br>9°68'E | Fen peat | Reed canary<br>grass   | 2013/05 | 2013/09 | 14.2 | 294 | -40 | 0-20 | 37.8 | 11.8 |     | 10    | Karki, S., et al., Carbon balance of rewetted and drained peat soils used for biomass production: a mesocosm study. <i>Gcb Bioenergy</i> , 2016. 8(5): 969-980.                                                         |
| Western<br>Jutland | 55°56'N,<br>8°26'E | Fen peat | Permanent<br>grassland | 2008/08 | 2009/10 | 9.5  | 913 | -37 | 0-30 | 27   | 18   | 4.3 | 9.41  | Görres, C.-M., L. Kutzbach, and L. Elsgaard, Comparative modeling of annual CO2 flux of temperate peat soils under permanent grassland management. <i>Agriculture, Ecosystems &amp; Environment</i> , 2014. 186: 64-76. |
| Western<br>Jutland | 55°56'N,<br>8°26'E | Fen peat | Permanent<br>grassland | 2008/08 | 2009/10 | 9.5  | 913 | -37 | 0-30 | 30   |      | 4.3 | 11.59 | Görres, C.-M., L. Kutzbach, and L. Elsgaard, Comparative modeling of annual CO2 flux of temperate peat soils under permanent grassland management. <i>Agriculture, Ecosystems &amp; Environment</i> , 2014. 186: 64-76. |

|                  |                  |          |                     |         |         |     |     |     |      |    |    |     |       |                                                                                                                                                                                                                                     |
|------------------|------------------|----------|---------------------|---------|---------|-----|-----|-----|------|----|----|-----|-------|-------------------------------------------------------------------------------------------------------------------------------------------------------------------------------------------------------------------------------------|
| Western Jutland  | 55°56'N, 8°26'E  | Fen peat | Permanent grassland | 2008/08 | 2009/10 | 9.5 | 913 | -37 | 0-30 | 40 |    | 4.1 | 8.32  | Görres, C.-M., L. Kutzbach, and L. Elsgaard, Comparative modeling of annual CO <sub>2</sub> flux of temperate peat soils under permanent grassland management. <i>Agriculture, Ecosystems &amp; Environment</i> , 2014. 186: 64-76. |
| Northern Jutland | 57°13'N, 09°49'E | Fen peat | Permanent grassland | 2008/08 | 2009/10 | 8.8 | 702 | -71 | 0-30 | 82 | 28 | 4.5 | 11.86 | Görres, C.-M., L. Kutzbach, and L. Elsgaard, Comparative modeling of annual CO <sub>2</sub> flux of temperate peat soils under permanent grassland management. <i>Agriculture, Ecosystems &amp; Environment</i> , 2014. 186: 64-76. |
| Northern Jutland | 57°13'N, 09°49'E | Fen peat | Permanent grassland | 2008/08 | 2009/10 | 8.8 | 702 | -61 | 0-30 | 81 |    | 4.5 | 12.14 | Görres, C.-M., L. Kutzbach, and L. Elsgaard, Comparative modeling of annual CO <sub>2</sub> flux of temperate peat soils under permanent grassland management. <i>Agriculture, Ecosystems &amp; Environment</i> , 2014. 186: 64-76. |
| Northern Jutland | 57°13'N, 09°49'E | Fen peat | Permanent grassland | 2008/08 | 2009/10 | 8.8 | 702 | -51 | 0-30 | 85 |    | 4.4 | 6.82  | Görres, C.-M., L. Kutzbach, and L. Elsgaard, Comparative modeling of annual CO <sub>2</sub> flux of temperate peat soils under permanent grassland management. <i>Agriculture, Ecosystems &amp; Environment</i> , 2014. 186: 64-76. |
| Eastern Jutland  | 56°23'N, 10°24'E | Bog peat | Permanent grassland | 2008/08 | 2009/10 | 9.1 | 579 | -73 | 0-30 | 91 | 25 | 3.2 | 4.50  | Görres, C.-M., L. Kutzbach, and L. Elsgaard, Comparative modeling of annual CO <sub>2</sub> flux of temperate peat soils under permanent grassland management. <i>Agriculture, Ecosystems &amp; Environment</i> , 2014. 186: 64-76. |
| Eastern Jutland  | 56°23'N, 10°24'E | Bog peat | Permanent grassland | 2008/08 | 2009/10 | 9.1 | 579 | -20 | 0-30 | 47 |    | 5.2 | 11.59 | Görres, C.-M., L. Kutzbach, and L. Elsgaard, Comparative modeling of annual CO <sub>2</sub> flux of temperate peat soils under permanent grassland management. <i>Agriculture, Ecosystems &amp; Environment</i> , 2014. 186: 64-76. |

|                 |                     |          |                     |         |         |     |     |     |      |    |  |   |       |                                                                                                                                                                                                                                     |
|-----------------|---------------------|----------|---------------------|---------|---------|-----|-----|-----|------|----|--|---|-------|-------------------------------------------------------------------------------------------------------------------------------------------------------------------------------------------------------------------------------------|
| Eastern Jutland | 56°23'N,<br>10°24'E | Bog peat | Permanent grassland | 2008/08 | 2009/10 | 9.1 | 579 | -28 | 0-30 | 26 |  | 5 | 14.73 | Görres, C.-M., L. Kutzbach, and L. Elsgaard, Comparative modeling of annual CO <sub>2</sub> flux of temperate peat soils under permanent grassland management. <i>Agriculture, Ecosystems &amp; Environment</i> , 2014. 186: 64-76. |
|-----------------|---------------------|----------|---------------------|---------|---------|-----|-----|-----|------|----|--|---|-------|-------------------------------------------------------------------------------------------------------------------------------------------------------------------------------------------------------------------------------------|



**Table S2: Overview of the measurement sites included in the Danish data synthesis for CH<sub>4</sub> fluxes. MAT: mean annual temperature, MAP: mean annual precipitation, GWT: groundwater table, where negative values indicate a water table below terrain.**

| Site           | Coordinates      | Soil Type           | Main crop | Starting Monitoring | Ending Monitoring | MAT (Celsius) | MAP (mm) | Mean WTD-cm | Soil Depth-cm | Organic C-% | C:N ratio | pH  | Annual fluxes CH <sub>4</sub> (g CH <sub>4</sub> m <sup>-2</sup> yr <sup>-1</sup> ) | Reference                                                                                                                                                                                                             |
|----------------|------------------|---------------------|-----------|---------------------|-------------------|---------------|----------|-------------|---------------|-------------|-----------|-----|-------------------------------------------------------------------------------------|-----------------------------------------------------------------------------------------------------------------------------------------------------------------------------------------------------------------------|
| Skjern-W       | 55°56'N, 8°26'E  | Arable crop         | Barley    | 2008/08             | 2009/09           | 9.3           | 913      | -48         | 0-30          | 20.3        | 17        | 5   | -0.02                                                                               | Petersen, S.O., et al., Annual emissions of CH <sub>4</sub> and N <sub>2</sub> O, and ecosystem respiration, from eight organic soils in Western Denmark managed by agriculture. Biogeosciences, 2012. 9(1): 403-422. |
| Skjern-W       | 55°56'N, 8°26'E  | Permanent grassland | Grass     | 2008/08             | 2009/09           | 9.6           | 913      | -42         | 0-30          | 15.7        | 18.2      | 4.9 | -0.16                                                                               | Petersen, S.O., et al., Annual emissions of CH <sub>4</sub> and N <sub>2</sub> O, and ecosystem respiration, from eight organic soils in Western Denmark managed by agriculture. Biogeosciences, 2012. 9(1): 403-422. |
| St. Vildmose-N | 57°14'N, 09°51'E | Arable crop         | Potato    | 2008/08             | 2009/09           | 8.7           | 702      | -70         | 0-30          | 47.3        | 30.2      | 4.5 | 0.03                                                                                | Petersen, S.O., et al., Annual emissions of CH <sub>4</sub> and N <sub>2</sub> O, and ecosystem respiration, from eight organic soils in Western Denmark managed by agriculture. Biogeosciences, 2012. 9(1): 403-422. |
| St. Vildmose-N | 57°14'N, 09°50'E | Permanent grassland | Grass     | 2008/08             | 2009/09           | 8.6           | 702      | -61         | 0-30          | 42.7        | 27.7      | 5.1 | 2.8                                                                                 | Petersen, S.O., et al., Annual emissions of CH <sub>4</sub> and N <sub>2</sub> O, and ecosystem respiration, from eight organic soils in Western Denmark managed by agriculture. Biogeosciences, 2012. 9(1): 403-422. |
| St. Vildmose-N | 57°14'N, 09°51'E | Rotational grass    | Grass     | 2008/08             | 2009/09           | 9.1           | 702      | -70         | 0-30          | 45.3        | 27.9      | 4.9 | -0.03                                                                               | Petersen, S.O., et al., Annual emissions of CH <sub>4</sub> and N <sub>2</sub> O, and ecosystem respiration, from eight organic soils in Western Denmark managed by agriculture. Biogeosciences, 2012. 9(1): 403-422. |

|          |                     |                        |              |         |         |     |     |      |      |      |      |     |       |                                                                                                                                                                                                      |
|----------|---------------------|------------------------|--------------|---------|---------|-----|-----|------|------|------|------|-----|-------|------------------------------------------------------------------------------------------------------------------------------------------------------------------------------------------------------|
| Mørke-E  | 56°23'N,<br>10°24'E | Arable<br>crop         | Barley/Grass | 2008/08 | 2009/09 | 9.2 | 579 | -111 | 0-30 | 32.7 | 29.3 | 4.9 | 0.38  | Petersen, S.O., et al., Annual emissions of CH4 and N2O, and ecosystem respiration, from eight organic soils in Western Denmark managed by agriculture. <i>Biogeosciences</i> , 2012. 9(1): 403-422. |
| Mørke-E  | 56°23'N,<br>10°24'E | Permanent<br>grassland | Grass        | 2008/08 | 2009/09 | 9   | 579 | -40  | 0-30 | 29.7 | 25.1 | 4.7 | 4.7   | Petersen, S.O., et al., Annual emissions of CH4 and N2O, and ecosystem respiration, from eight organic soils in Western Denmark managed by agriculture. <i>Biogeosciences</i> , 2012. 9(1): 403-422. |
| Mørke-E  | 56°23'N,<br>10°24'E | Rotational<br>grass    | Barley/Grass | 2008/08 | 2009/09 | 9.2 | 579 | -43  | 0-30 | 30   | 25.6 | 5.8 | 0.03  | Petersen, S.O., et al., Annual emissions of CH4 and N2O, and ecosystem respiration, from eight organic soils in Western Denmark managed by agriculture. <i>Biogeosciences</i> , 2012. 9(1): 403-422. |
| Karup-P1 | 56°25'N,<br>9°0'E   | riparian<br>wetlands   |              | 2010/06 | 2011/06 | 7.6 | 740 | 2.2  | 0-30 | 21   | 20.4 | 6.6 | 0.13  | Audet, J., et al., Methane emissions in Danish riparian wetlands: ecosystem comparison and pursuit of vegetation indexes as predictive tools. <i>Ecological indicators</i> , 2013. 34: 548-559.      |
| Karup-P2 | 56°25'N,<br>9°0'E   | riparian<br>wetlands   |              | 2010/06 | 2011/06 | 7.6 | 740 | 2.5  | 0-30 | 14   | 20.4 | 6.7 | 51.07 | Audet, J., et al., Methane emissions in Danish riparian wetlands: ecosystem comparison and pursuit of vegetation indexes as predictive tools. <i>Ecological indicators</i> , 2013. 34: 548-559.      |
| Karup-P3 | 56°25'N,<br>9°0'E   | riparian<br>wetlands   |              | 2010/06 | 2011/06 | 7.6 | 740 | -4.8 | 0-30 | 13   | 18.8 | 6.8 | 26.40 | Audet, J., et al., Methane emissions in Danish riparian wetlands: ecosystem comparison and pursuit of vegetation indexes as predictive tools. <i>Ecological indicators</i> , 2013. 34: 548-559.      |

|            |                    |                   |  |         |         |     |     |       |      |    |      |     |       |                                                                                                                                                                                         |
|------------|--------------------|-------------------|--|---------|---------|-----|-----|-------|------|----|------|-----|-------|-----------------------------------------------------------------------------------------------------------------------------------------------------------------------------------------|
| Haderup-P1 | 56°24'N,<br>9°0'E  | riparian wetlands |  | 2010/06 | 2011/06 | 7.6 | 831 | -0.6  | 0-30 | 44 | 21.4 | 6.3 | 51.07 | Audet, J., et al., Methane emissions in Danish riparian wetlands: ecosystem comparison and pursuit of vegetation indexes as predictive tools. Ecological indicators, 2013. 34: 548-559. |
| Haderup-P2 | 56°24'N,<br>9°0'E  | riparian wetlands |  | 2010/06 | 2011/06 | 7.6 | 831 | -3.3  | 0-30 | 14 | 20.7 | 6.3 | 18.40 | Audet, J., et al., Methane emissions in Danish riparian wetlands: ecosystem comparison and pursuit of vegetation indexes as predictive tools. Ecological indicators, 2013. 34: 548-559. |
| Haderup-P3 | 56°24'N,<br>9°0'E  | riparian wetlands |  | 2010/06 | 2011/06 | 7.6 | 831 | -12   | 0-30 | 24 | 21.5 | 7   | 1.73  | Audet, J., et al., Methane emissions in Danish riparian wetlands: ecosystem comparison and pursuit of vegetation indexes as predictive tools. Ecological indicators, 2013. 34: 548-559. |
| Simsted-P1 | 56°41'N,<br>9°29'E | riparian wetlands |  | 2010/06 | 2011/06 | 7.6 | 688 | 0.2   | 0-30 | 10 | 15.7 | 6.3 | 17.73 | Audet, J., et al., Methane emissions in Danish riparian wetlands: ecosystem comparison and pursuit of vegetation indexes as predictive tools. Ecological indicators, 2013. 34: 548-559. |
| Simsted-P2 | 56°41'N,<br>9°29'E | riparian wetlands |  | 2010/06 | 2011/06 | 7.6 | 688 | -12.6 | 0-30 | 45 | 22.8 | 6.5 | 16.27 | Audet, J., et al., Methane emissions in Danish riparian wetlands: ecosystem comparison and pursuit of vegetation indexes as predictive tools. Ecological indicators, 2013. 34: 548-559. |
| Simsted-P3 | 56°41'N,<br>9°29'E | riparian wetlands |  | 2010/06 | 2011/06 | 7.6 | 688 | -18.9 | 0-30 | 24 | 16.5 | 5.8 | 8.13  | Audet, J., et al., Methane emissions in Danish riparian wetlands: ecosystem comparison and pursuit of vegetation indexes as predictive tools. Ecological indicators, 2013. 34: 548-559. |

|                |                       |                       |                     |         |         |     |     |       |      |    |      |     |       |                                                                                                                                                                                                                                                                                                                                      |
|----------------|-----------------------|-----------------------|---------------------|---------|---------|-----|-----|-------|------|----|------|-----|-------|--------------------------------------------------------------------------------------------------------------------------------------------------------------------------------------------------------------------------------------------------------------------------------------------------------------------------------------|
| Villestrup-P1  | 56°44'N, 9°57'E       | riparian wetlands     |                     | 2010/06 | 2011/06 | 7.5 | 764 | -5.4  | 0-30 | 24 | 18.7 | 5.5 | 34.13 | Audet, J., et al., Methane emissions in Danish riparian wetlands: ecosystem comparison and pursuit of vegetation indexes as predictive tools. Ecological indicators, 2013. 34: 548-559.                                                                                                                                              |
| Villestrup-P2  | 56°44'N, 9°57'E       | riparian wetlands     |                     | 2010/06 | 2011/06 | 7.5 | 764 | -57.1 | 0-30 | 2  | 15.3 | 4.7 | 0.13  | Audet, J., et al., Methane emissions in Danish riparian wetlands: ecosystem comparison and pursuit of vegetation indexes as predictive tools. Ecological indicators, 2013. 34: 548-559.                                                                                                                                              |
| Villestrup-P3  | 56°44'N, 9°57'E       | riparian wetlands     |                     | 2010/06 | 2011/06 | 7.5 | 764 | -39.2 | 0-30 | 4  | 15.8 | 4.8 | -0.27 | Audet, J., et al., Methane emissions in Danish riparian wetlands: ecosystem comparison and pursuit of vegetation indexes as predictive tools. Ecological indicators, 2013. 34: 548-559.                                                                                                                                              |
| Store Vildmose | 57°13'48"N, 9°50'24"E | Undrained natural Bog |                     | 2014/06 | 2015/06 | 7.9 | 740 | -5    | 0-25 | 41 | 32   | 3.4 | 17.2  | Kandel, T.P., P.E. Lærke, and L. Elsgaard, Annual emissions of CO <sub>2</sub> , CH <sub>4</sub> and N <sub>2</sub> O from a temperate peat bog: Comparison of an undrained and four drained sites under permanent grass and arable crop rotations with cereals and potato. Agricultural and Forest Meteorology, 2018. 256: 470-481. |
| Store Vildmose | 57°13'48"N, 9°50'24"E | Drained peat bog      | permanent grassland | 2014/06 | 2015/06 | 7.9 | 740 | -60   | 0-25 | 39 | 21   | 4.3 | -0.15 | Kandel, T.P., P.E. Lærke, and L. Elsgaard, Annual emissions of CO <sub>2</sub> , CH <sub>4</sub> and N <sub>2</sub> O from a temperate peat bog: Comparison of an undrained and four drained sites under permanent grass and arable crop rotations with cereals and potato. Agricultural and Forest Meteorology, 2018. 256: 470-481. |
| Store Vildmose | 57°13'48"N, 9°50'24"E | Drained peat bog      | Oat-Potato          | 2014/06 | 2015/06 | 7.9 | 740 | -60   | 0-25 | 34 | 25   | 4   | 0.15  | Kandel, T.P., P.E. Lærke, and L. Elsgaard, Annual emissions of CO <sub>2</sub> , CH <sub>4</sub> and N <sub>2</sub> O from a temperate peat bog: Comparison of an undrained and four drained sites under permanent grass and arable crop rotations with cereals and potato. Agricultural and Forest Meteorology, 2018. 256: 470-481. |

|                    |                          |                           |                                            |         |         |     |     |     |      |    |    |         |             |                                                                                                                                                                                                                                                                                                                                      |
|--------------------|--------------------------|---------------------------|--------------------------------------------|---------|---------|-----|-----|-----|------|----|----|---------|-------------|--------------------------------------------------------------------------------------------------------------------------------------------------------------------------------------------------------------------------------------------------------------------------------------------------------------------------------------|
| Store Vildmose     | 57°13'48"N,<br>9°50'24"E | Drained peat bog          | Oat-Spring barley                          | 2014/06 | 2015/06 | 7.9 | 740 | -60 | 0-25 | 32 | 24 | 4.8     | -0.14       | Kandel, T.P., P.E. Lærke, and L. Elsgaard, Annual emissions of CO <sub>2</sub> , CH <sub>4</sub> and N <sub>2</sub> O from a temperate peat bog: Comparison of an undrained and four drained sites under permanent grass and arable crop rotations with cereals and potato. Agricultural and Forest Meteorology, 2018. 256: 470-481. |
| Store Vildmose     | 57°13'48"N,<br>9°50'24"E | Drained peat bog          | Potato-Spring barley                       | 2014/06 | 2015/06 | 7.9 | 740 | -60 | 0-25 | 33 | 24 | 4       | -0.06       | Kandel, T.P., P.E. Lærke, and L. Elsgaard, Annual emissions of CO <sub>2</sub> , CH <sub>4</sub> and N <sub>2</sub> O from a temperate peat bog: Comparison of an undrained and four drained sites under permanent grass and arable crop rotations with cereals and potato. Agricultural and Forest Meteorology, 2018. 256: 470-481. |
| Nørre Å            | 56°27'N,<br>9°40'E       | Fen peat                  | Reed canary grass-Fertilized paludiculture | 2015/03 | 2017/03 | 8.6 | 755 | -1  | 0-20 | 36 | 12 | 5.7-6.3 | 99 [82-116] | Kandel, T.P., et al., Methane fluxes from a rewetted agricultural fen during two initial years of paludiculture. Science of The Total Environment, 2020. 713: 136670.                                                                                                                                                                |
| Nørre Å            | 56°27'N,<br>9°40'E       | Fen peat                  | Reed canary grass-Fertilized paludiculture | 2015/03 | 2017/03 | 8.6 | 755 | -3  | 0-20 | 36 | 12 | 5.7-6.3 | 52 [35-69]  | Kandel, T.P., et al., Methane fluxes from a rewetted agricultural fen during two initial years of paludiculture. Science of The Total Environment, 2020. 713: 136670.                                                                                                                                                                |
| Nørre Å            | 56°27'N,<br>9°40'E       | Fen peat                  | Reed canary grass-Fertilized paludiculture | 2015/03 | 2017/03 | 8.6 | 755 | -9  | 0-20 | 36 | 12 | 5.7-6.3 | 6[3-9]      | Kandel, T.P., et al., Methane fluxes from a rewetted agricultural fen during two initial years of paludiculture. Science of The Total Environment, 2020. 713: 136670.                                                                                                                                                                |
| Odense River Basin | 55°13'N,<br>10°17'E      | Rewetted riparian wetland | creeping bentgrass                         | 2015/03 | 2016/03 | 8.8 | 808 | 0   | 0-25 | 30 |    | 5.9-6.9 | 53          | Kandel, T.P., et al., Complete annual CO <sub>2</sub> , CH <sub>4</sub> , and N <sub>2</sub> O balance of a temperate riparian wetland 12 years after rewetting. Ecological Engineering, 2019. 127: 527-535.                                                                                                                         |

|         |                    |          |                      |         |         |      |     |     |      |      |      |         |      |                                                                                                                                                                                                                                   |
|---------|--------------------|----------|----------------------|---------|---------|------|-----|-----|------|------|------|---------|------|-----------------------------------------------------------------------------------------------------------------------------------------------------------------------------------------------------------------------------------|
| Nørre Å | 56°44'N,<br>9°68'E | Fen peat | Spring<br>barley     | 2010/09 | 2011/09 | 7.3  | 750 | -40 | 0-30 | 36   | 12   | 6.1-7.1 | 0.01 | Karki, S., et al., Full GHG balance of a drained fen peatland cropped to spring barley and reed canary grass using comparative assessment of CO <sub>2</sub> fluxes. Environmental monitoring and assessment, 2015. 187(3): 1-13. |
| Nørre Å | 56°44'N,<br>9°68'E | Fen peat | Reed canary<br>grass | 2010/09 | 2011/09 | 7.3  | 750 | -40 | 0-30 | 36   | 12   | 6.1-7.1 | 0.09 | Karki, S., et al., Full GHG balance of a drained fen peatland cropped to spring barley and reed canary grass using comparative assessment of CO <sub>2</sub> fluxes. Environmental monitoring and assessment, 2015. 187(3): 1-13. |
| Nørre Å | 56°44'N,<br>9°68'E | Fen peat | Reed canary<br>grass | 2012/07 | 2013/07 | 6.9  | 667 | 0   | 0-20 | 37.8 | 11.8 |         | 4.1  | Karki, S., L. Elsgaard, and P.E. Lærke, Effect of reed canary grass cultivation on greenhouse gas emission from peat soil at controlled rewetting. Biogeosciences, 2015. 12(2): 595-606.                                          |
| Nørre Å | 56°44'N,<br>9°68'E | Fen peat | Reed canary<br>grass | 2013/05 | 2013/09 | 14.2 | 294 | 0   | 0-20 | 37.8 | 11.8 |         | 11.8 | Karki, S., et al., Carbon balance of rewetted and drained peat soils used for biomass production: a mesocosm study. Gcb Bioenergy, 2016. 8(5): 969-980.                                                                           |
| Nørre Å | 56°44'N,<br>9°68'E | Fen peat | Reed canary<br>grass | 2013/05 | 2013/09 | 14.2 | 294 | -10 | 0-20 | 37.8 | 11.8 |         | 6.2  | Karki, S., et al., Carbon balance of rewetted and drained peat soils used for biomass production: a mesocosm study. Gcb Bioenergy, 2016. 8(5): 969-980.                                                                           |
| Nørre Å | 56°44'N,<br>9°68'E | Fen peat | Reed canary<br>grass | 2013/05 | 2013/09 | 14.2 | 294 | -20 | 0-20 | 37.8 | 11.8 |         | 1.8  | Karki, S., et al., Carbon balance of rewetted and drained peat soils used for biomass production: a mesocosm study. Gcb Bioenergy, 2016. 8(5): 969-980.                                                                           |

|                                |                    |                     |                      |         |         |      |     |     |      |      |      |       |                                                                                                                                                                 |
|--------------------------------|--------------------|---------------------|----------------------|---------|---------|------|-----|-----|------|------|------|-------|-----------------------------------------------------------------------------------------------------------------------------------------------------------------|
| Nørre Å                        | 56°44'N,<br>9°68'E | Fen peat            | Reed canary<br>grass | 2013/05 | 2013/09 | 14.2 | 294 | -30 | 0-20 | 37.8 | 11.8 | 0.6   | Karki, S., et al., Carbon balance of rewetted and drained peat soils used for biomass production: a mesocosm study. <i>Gcb Bioenergy</i> , 2016. 8(5): 969-980. |
| Nørre Å                        | 56°44'N,<br>9°68'E | Fen peat            | Reed canary<br>grass | 2013/05 | 2013/09 | 14.2 | 294 | -40 | 0-20 | 37.8 | 11.8 | 0     | Karki, S., et al., Carbon balance of rewetted and drained peat soils used for biomass production: a mesocosm study. <i>Gcb Bioenergy</i> , 2016. 8(5): 969-980. |
| Oddebæk<br>riparian<br>wetland | 55°55'N,<br>9°17'E | riparian<br>wetland |                      | 2010/05 | 2011/12 |      |     | 9   | 0-30 | 7    | 17.4 | 42.7  | Audet, J., et al., Greenhouse gas emissions from a Danish riparian wetland before and after restoration. <i>Ecological Engineering</i> , 2013. 57: 170-182.     |
| Oddebæk<br>riparian<br>wetland | 55°55'N,<br>9°17'E | riparian<br>wetland |                      | 2010/05 | 2011/12 |      |     | -41 | 0-30 | 33.4 | 24.1 | -0.08 | Audet, J., et al., Greenhouse gas emissions from a Danish riparian wetland before and after restoration. <i>Ecological Engineering</i> , 2013. 57: 170-182.     |
| Oddebæk<br>riparian<br>wetland | 55°55'N,<br>9°17'E | riparian<br>wetland |                      | 2010/05 | 2011/12 |      |     | -36 | 0-30 | 27   | 10   | -0.16 | Audet, J., et al., Greenhouse gas emissions from a Danish riparian wetland before and after restoration. <i>Ecological Engineering</i> , 2013. 57: 170-182.     |
